# Supplementary material for: Fabrication and characterization of ferritin–chitosan–lutein shell–core nanocomposites and lutein stability and release evaluation in vitro
Source: Royal Society of Chemistry journal article supplement (doi:10.1039/c6ra04058f), 2016-01-01
Supplement: c6ra04058f1.pdf [file c6ra04058f1.pdf]

## Electronic Supporting Information

### **Fabrication and characterization of ferritin-chitosan-lutein shell-core nanocomposites and lutein stability and release evaluation *in vitro***

Rui Yang<sup>1,2</sup>, Yunjing Gao<sup>1</sup>, Zhongkai Zhou<sup>1,2,\*</sup>, Padraig Strappe<sup>3</sup>, Chris Blanchard<sup>3</sup>

<sup>1</sup>Key Laboratory of Food Nutrition and Safety, Ministry of Education, Tianjin University of Science and Technology, Tianjin 300457, China.

<sup>2</sup>Tianjin Food Safety & Low Carbon Manufacturing Collaborative Innovation Center, 300457, Tianjin, China.

<sup>3</sup>ARC Industrial Transformation Training Centre for Functional Grains, School of Biomedical Sciences, Charles Sturt University, Wagga Wagga NSW 2678, Australia.

\*Corresponding author

Prof. Zhongkai Zhou (PhD)

School of Food Engineering and Biotechnology,

Tianjin University of Science and Technology, Tianjin, 300457, China.

Phone +862260601408

Fax +862260601371

E-mail: [zkzhou@tust.edu.cn](mailto:zkzhou@tust.edu.cn)

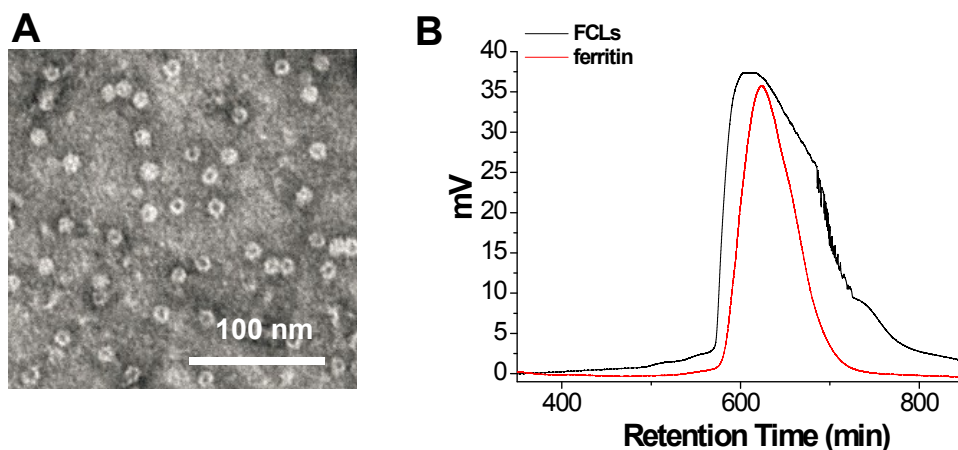

Fig. S1 (A) TEM of the apoSSF (2.0  $\mu$ M) simply mixed with lutein (300  $\mu$ M) followed by dialysis by Mops buffer (20 mM, pH 6.0) with two buffer changes (every 8.0 h intervals); (B) Size exclusion chromatography of ferritin and FCLs at pH 6.0.

#### **Procedure and condition of Size exclusion chromatography experiment**

Size exclusion chromatography was performed by a purificating column (1.5 $\times$ 120 cm) filling with Sephacryl S-300 resin (GE. Inc., USA) consisting of an UV detector (280 nm) (4.6 $\times$ 250mm, 5 $\mu$ m). Samples were eluted by the use of a mobile phase consisting of 50 mM Mops, 0.15 M NaCl. The injection volume was 5 mL, and the flow rate of the mobile phase was 0.4 mL/min. The flowed samples were collected by 10 mL tubes with a rate of 10 min/tubes.

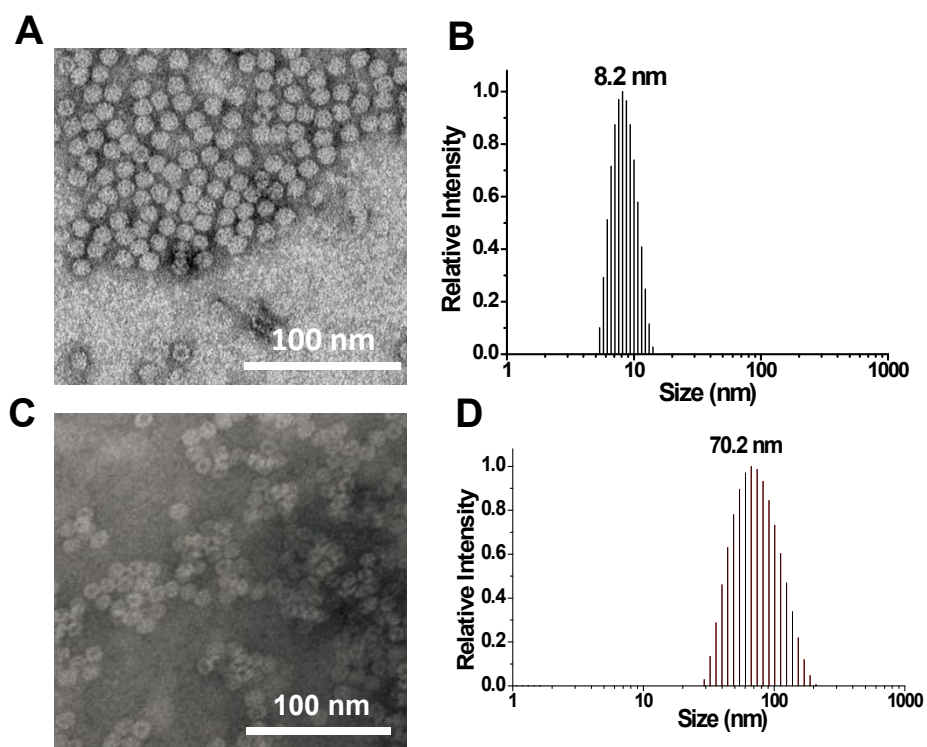

Fig. S2 (A) TEM of ferritin-lutein complex in the presence of 17% ethanol; (B) DLS of ferritin-lutein complex in the presence of 17% ethanol; (C) TEM of ferritin-lutein complex in the presence of 30% ethanol; (D) DLS of ferritin-lutein complex in the presence of 30% ethanol.

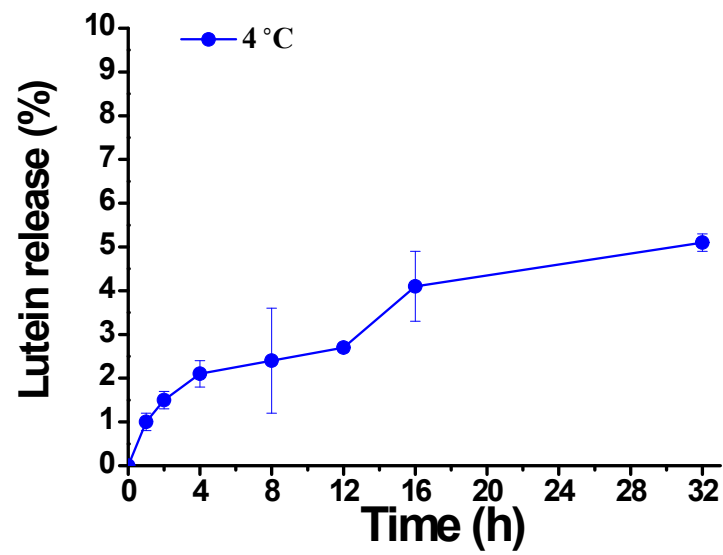

Fig. S3 Kinetics of lutein release from FCLs at different dialysis time.
